# Supplementary material for: Predictive Value of the C-Reactive Protein-to-Albumin Ratio for Anastomotic Leakage Following Colorectal Surgery
Source: Research Square preprint supplement (doi:10.21203/rs.3.rs-7059728/v1), 2025-07-29
Supplement: Supplementary file 1 [file 09502b4e21a5288501db4f52.docx]

**Supplementary File 1: Data Collection Form**

**Study Title:** Predictive Value of the C-Reactive Protein-to-Albumin Ratio for Anastomotic Leakage Following Colorectal Surgery

**Instructions:** This form is to be completed for each patient prospectively enrolled in the study. Please fill in all sections as completely as possible using data from patient interviews, medical records, surgical notes, and laboratory reports.

# **Section 1: Patient Demographics & Baseline Data**

| **Parameter** | **Value / Selection** |
| --- | --- |
| **Patient Study ID:** | _________________________ |
| **Date of Admission:** | ______ / ______ / ________ (DD/MM/YYYY) |
| **Age (years):** | _________________________ |
| **Sex:** | ☐ Male ☐ Female |
| **Weight (kg):** | _________________________ |
| **Height (m):** | _________________________ |
| **Body Mass Index (BMI) ( kg/m ²):** | _________________________ |

# **Section 2: Clinical Parameters & Comorbidities**

| **Parameter** | **Selection / Details** |
| --- | --- |
| **ASA Physical Status:** | ☐ Class I ☐ Class II ☐ Class III ☐ Class IV ☐ Class V |
| **Pre-existing Comorbidities:** | (Check all that apply)  ☐ Diabetes Mellitus  ☐ Hypertension  ☐ Ischemic Heart Disease  ☐ Chronic Liver Disease  ☐ Other (specify): _________________________ |
| **Preoperative Steroid Use:** | ☐ Yes ☐ No |

# **Section 3: Preoperative Laboratory Values**

| **Lab Test** | **Value** | **Units** | **Date of Sample** |
| --- | --- | --- | --- |
| **Hemoglobin** | ________________ | g/dL | ______ / ______ / ________ |
| **White Blood Cell (WBC) Count** | ________________ | ×10⁹/L | ______ / ______ / ________ |
| **Serum Creatinine** | ________________ | mg/dL | ______ / ______ / ________ |
| **Preoperative C-Reactive Protein (CRP)** | ________________ | mg/L | ______ / ______ / ________ |
| **Preoperative Serum Albumin (S.Alb)** | ________________ | g/dL | ______ / ______ / ________ |

# **Section 4: Intraoperative Details**

| **Parameter** | **Details / Selection** |
| --- | --- |
| **Date of Surgery:** | ______ / ______ / ________ (DD/MM/YYYY) |
| **Surgical Procedure Performed:** | __________________________________________________ |
| **Anastomosis Level:** | ☐ Ileocolic ☐ Colorectal ☐ Other: __________________ |
| **Anastomosis Configuration:** | ☐ End-to-end ☐ Side-to-end ☐ Side-to-side |
| **Anastomosis Technique:** | ☐ Hand-sewn ☐ Stapled |

# **Section 5: Postoperative Laboratory Values**

| **Lab Test** | **Value (mg/L)** | **Date of Sample** |
| --- | --- | --- |
| **CRP on Postoperative Day 1 (POD1)** | ________________ | ______ / ______ / ________ |
| **CRP on Postoperative Day 3 (POD3)** | ________________ | ______ / ______ / ________ |
| **CRP on Postoperative Day 5 (POD5)** | ________________ | ______ / ______ / ________ |

# **Section 6: Postoperative Outcomes (within 30 days)**

| **Outcome** | **Details / Selection** |
| --- | --- |
| **Anastomotic Leakage (AL) Occurred:** | ☐ Yes ☐ No |
| *If Yes, Date of Diagnosis:* | ______ / ______ / ________ (DD/MM/YYYY) |
| *If Yes, Method of Confirmation:* | ☐ Clinical ☐ Radiological ☐ Intraoperative |
| *If Yes, Management of AL:* | ☐ Conservative ☐ Diversion Stoma ☐ Re-laparotomy <br> ☐ Other: ____________________________________ |
| **Length of Hospital Stay:** | _______________ (days) |
| **30-Day Mortality:** | ☐ Yes ☐ No |
| *If Yes, Date of Death:* | ______ / ______ / ________ (DD/MM/YYYY) |
| **Other Postoperative Complications:** | (Check all that apply)  ☐ Surgical Site Infection  ☐ Wound Dehiscence  ☐ Abdominal Abscess  ☐ Paralytic Ileus  ☐ Intestinal Obstruction  ☐ Bleeding / Hematoma  ☐ Urological (UTI)  ☐ Respiratory (atelectasis, chest infection)  ☐ Cardiac Event  ☐ Deep Vein Thrombosis  ☐ Other (specify): ___________________________ |

# **Section 7: Consent**

| **Parameter** | **Details** |
| --- | --- |
| **Written Informed Consent Obtained:** | ☐ Yes ☐ No |
| **Date of Consent:** | ______ / ______ / ________ (DD/MM/YYYY) |

**End of Form**
